# Supplementary material for: Number of infection events per cell during HIV-1 cell-free infection
Source: PubMed Central journal article supplement (PMC5529392; doi:10.1038/s41598-017-03954-9), 2017-07-26
Supplement: 41598_2017_3954_MOESM1_ESM.pdf [file 41598_2017_3954_MOESM1_ESM.pdf]

## Supplementary Information

Number of infection events per cell during HIV-1 cell-free infection

Yusuke Ito<sup>1,‡</sup>, Azaria Remion<sup>2,3,4,‡</sup>, Alexandra Tauzin<sup>2,3,4</sup>, Keisuke Ejima<sup>5</sup>, Shinji Nakaoka<sup>6,7</sup>, Yoh Iwasa<sup>1</sup>, Shingo Iwami<sup>1,6,7,†,\*</sup>, & Fabrizio Mammano<sup>2,3,4,†,\*</sup>

<sup>1</sup>Department of Biology, Faculty of Sciences, Kyushu University, Fukuoka 819-0395, Japan. <sup>2</sup>INSERM, U941, 75010 Paris, France. <sup>3</sup>Univ Paris Diderot, Sorbonne Paris Cité, IUH, 75010 Paris, France. <sup>4</sup>Institut Universitaire d'Hématologie, Hôpital Saint-Louis, 75010 Paris, France. <sup>5</sup>School of Public Health, University of Alabama at Birmingham, Alabama 35294-0011, USA. <sup>6</sup>PRESTO, JST, Saitama 332-0012, Japan. <sup>7</sup>Institute of Industrial Science, The University of Tokyo, Meguro-ku, Tokyo 153-8505, Japan. <sup>8</sup>CREST, JST, Saitama 332-0012, Japan.

‡,† These authors contributed equally to this study.

\* Correspondence and requests for materials should be addressed to S.I. (email: siwami@kyushu-u.org) or F.M. (email: fabrizio.mammano@inserm.fr).

## Supplementary Note: Calculation of theoretical odds ratio

We derived the theoretical odds ratio,  $OR_M$ , by Eqs. (1–4) as follows:

$$OR_M = \frac{F_B(\boldsymbol{\theta})F_C(\boldsymbol{\theta})}{F_A(\boldsymbol{\theta})F_D(\boldsymbol{\theta})}$$

$$= 1 + \frac{\frac{1}{\left(1 + \frac{\beta}{q}(\bar{V}_{HSA} + \bar{V}_{GFP})\right)^p} - \frac{1}{\left(1 + \frac{\beta}{q}\bar{V}_{HSA}\right)^p \left(1 + \frac{\beta}{q}\bar{V}_{GFP}\right)^p}}{\left\{ \frac{1}{\left(1 + \frac{\beta}{q}\bar{V}_{GFP}\right)^p} - \frac{1}{\left(1 + \frac{\beta}{q}(\bar{V}_{HSA} + \bar{V}_{GFP})\right)^p} \right\} \left\{ \frac{1}{\left(1 + \frac{\beta}{q}\bar{V}_{HSA}\right)^p} - \frac{1}{\left(1 + \frac{\beta}{q}(\bar{V}_{HSA} + \bar{V}_{GFP})\right)^p} \right\}}$$

Because  $\beta > 0$ ,  $p > 0$ ,  $1/q > 0$ ,  $\bar{V}_{HSA} > 0$ ,  $\bar{V}_{GFP} > 0$  and

$$0 < 1 + \frac{\beta}{q}(\bar{V}_{HSA} + \bar{V}_{GFP}) < \left(1 + \frac{\beta}{q}\bar{V}_{HSA}\right)\left(1 + \frac{\beta}{q}\bar{V}_{GFP}\right),$$

we obtained the following relationship of

$$0 < \left(1 + \frac{\beta}{q}(\bar{V}_{HSA} + \bar{V}_{GFP})\right)^p < \left(1 + \frac{\beta}{q}\bar{V}_{HSA}\right)^p \left(1 + \frac{\beta}{q}\bar{V}_{GFP}\right)^p.$$

Thus, it is shown that

$$\frac{1}{\left(1 + \frac{\beta}{q}(\bar{V}_{HSA} + \bar{V}_{GFP})\right)^p} - \frac{1}{\left(1 + \frac{\beta}{q}\bar{V}_{HSA}\right)^p \left(1 + \frac{\beta}{q}\bar{V}_{GFP}\right)^p} > 0.$$

Hence, the numerator in the second term of  $OR_M$  is always positive. Similarly, since

$$0 < 1 + \frac{\beta}{q}\bar{V}_{GFP} < 1 + \frac{\beta}{q}(\bar{V}_{HSA} + \bar{V}_{GFP}),$$

we obtained

$$0 < \left(1 + \frac{\beta}{q}\bar{V}_{GFP}\right)^p < \left(1 + \frac{\beta}{q}(\bar{V}_{HSA} + \bar{V}_{GFP})\right)^p,$$

this leads to

$$\frac{1}{\left(1 + \frac{\beta}{q}\bar{V}_{GFP}\right)^p} - \frac{1}{\left(1 + \frac{\beta}{q}(\bar{V}_{HSA} + \bar{V}_{GFP})\right)^p} > 0.$$

This inequality explains why the denominator in the second term of  $OR_M$  is always positive. Therefore, we were able to show that  $OR_M > 1$  holds.

**a**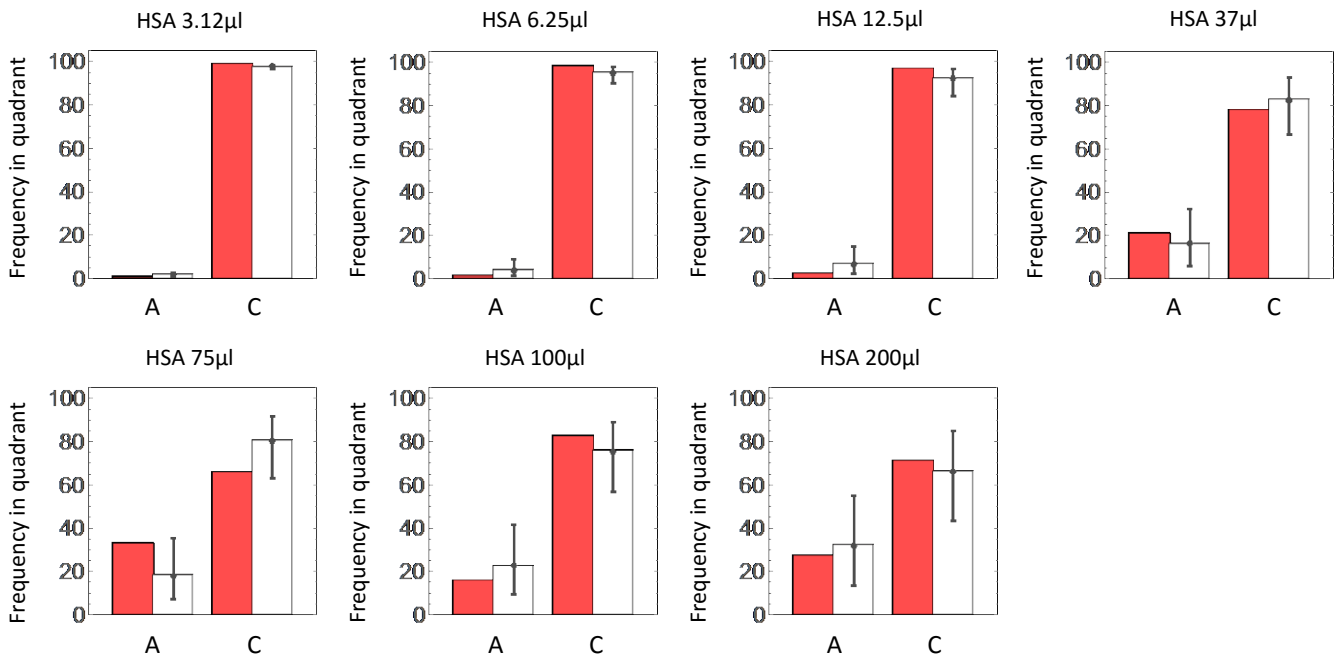**b**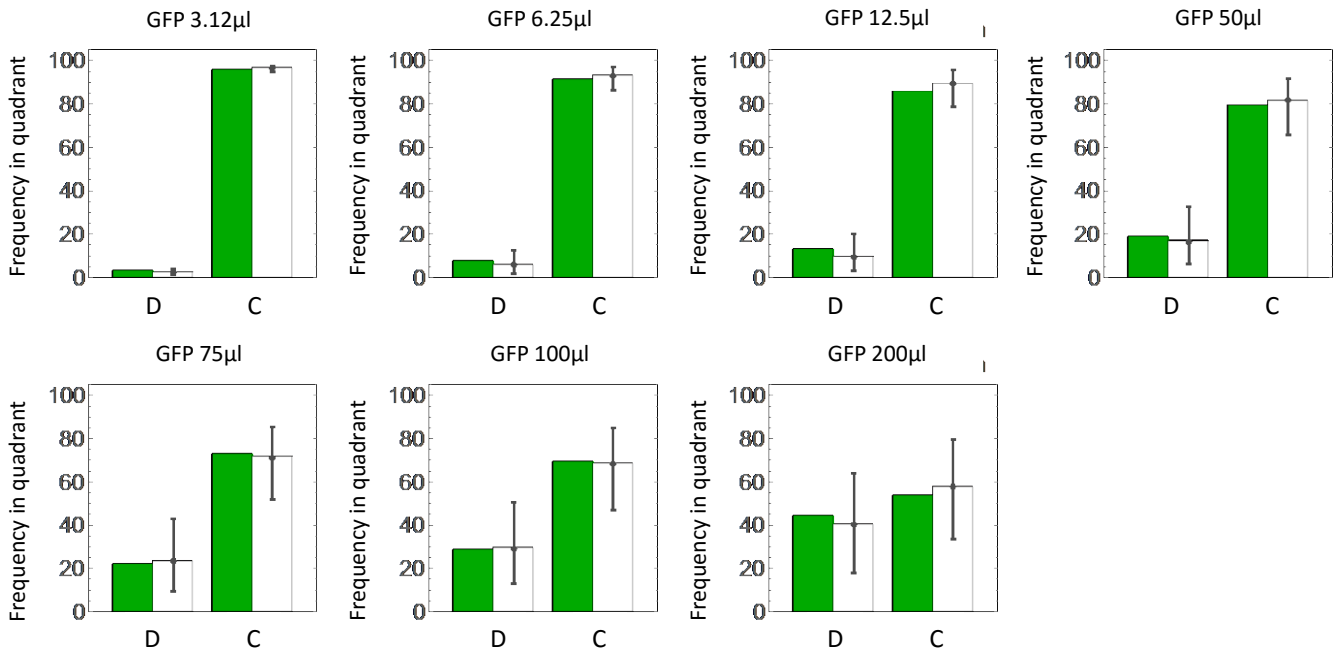

**C**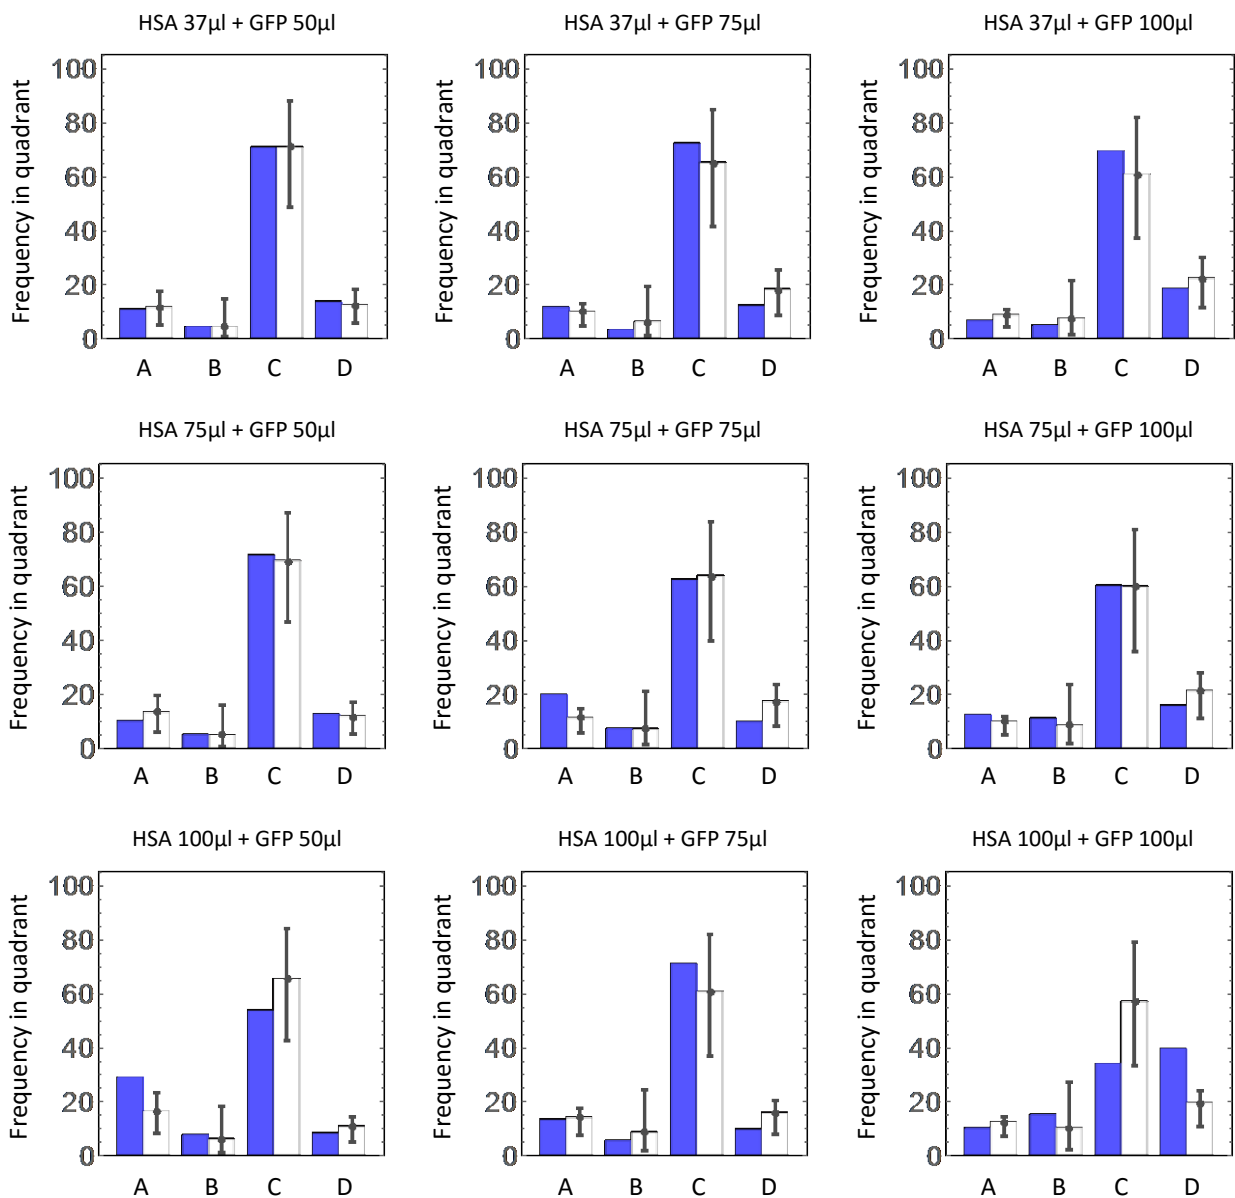

**Figure S1 | Frequency of single infection and coinfection in other experiment: (a)** The experimental and theoretical frequencies of quadrants A (i.e., HSA-positive) and C (i.e., HSA-negative) in seven independent experiments using only HSA HIV-1 are shown by red and white bars, respectively. **(b)** The experimental and theoretical frequencies of quadrants D (i.e., GFP-positive) and C (i.e., GFP-negative) in single GFP HIV-1 experiments are shown by green and white bars, respectively. **(c)** The experimental and theoretical frequencies of quadrants A, B (i.e., positive both for HSA and GFP), C (i.e., negative both for HSA and GFP), and D in double HIV-1 experiments are shown by blue and white bars, respectively, with different combinations of inoculated viral amount. Note that each error bar represents 95% credible interval obtained from Markov Chain Monte Carlo(MCMC) parameter inferences.

# To examine how many HIV-1s infect T-cells in cell-free infection

## Data

$F_A$ : frequency of cells infected by HSA+ HIV-1 only in quadrant A

$F_B$ : frequency of cells infected by HSA+ & GFP+ HIV-1 in quadrant B

$F_C$ : frequency of non-infected cells in quadrant C

$F_D$ : frequency of cells infected by GFP+ HIV-1 only in quadrant D

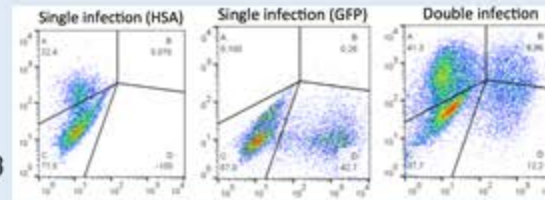

Details of the experiment

|        |                                |     |                                  |             |
|--------|--------------------------------|-----|----------------------------------|-------------|
| HSA    | 3.12 $\mu$ l                   | ... | 200 $\mu$ l                      | 10 datasets |
| GFP    | 3.12 $\mu$ l                   | ... | 200 $\mu$ l                      | 10 datasets |
| Double | 25 $\mu$ l $\times$ 25 $\mu$ l | ... | 100 $\mu$ l $\times$ 100 $\mu$ l | 18 datasets |

Bayesian inference

## Result

### Distribution of the parameters

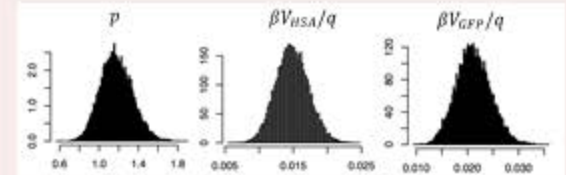

Prediction

### Number of infection events

|                                                  |      | HSA HIV-1 100 $\mu$ l + GFP HIV-1 100 $\mu$ l    |       |       |
|--------------------------------------------------|------|--------------------------------------------------|-------|-------|
| Number of infection events by HSA HIV-1 per cell | 2    | 0.018                                            | 0.012 | 0.006 |
|                                                  | 1    | 0.10                                             | 0.050 | 0.018 |
| 0                                                | 0.57 | 0.15                                             | 0.036 |       |
|                                                  |      | 0                                                | 1     | 2     |
|                                                  |      | Number of infection events by GFP HIV-1 per cell |       |       |

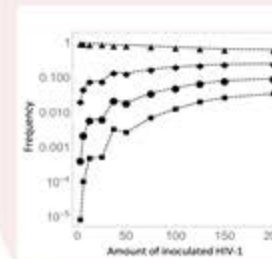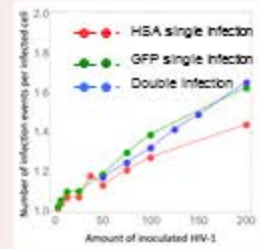

## Predicted value

$$F_A = \frac{1}{\left(1 + \frac{\beta}{q} \bar{V}_{GFP}\right)^p} - \frac{1}{\left(1 + \frac{\beta}{q} (\bar{V}_{GFP} + \bar{V}_{HSA})\right)^p}$$

$$F_B = 1 - \frac{1}{\left(1 + \frac{\beta}{q} \bar{V}_{HSA}\right)^p} - \frac{1}{\left(1 + \frac{\beta}{q} \bar{V}_{GFP}\right)^p} + \frac{1}{\left(1 + \frac{\beta}{q} (\bar{V}_{HSA} + \bar{V}_{GFP})\right)^p}$$

$$F_C = \frac{1}{\left(1 + \frac{\beta}{q} (\bar{V}_{HSA} + \bar{V}_{GFP})\right)^p}$$

$$F_D = \frac{1}{\left(1 + \frac{\beta}{q} \bar{V}_{HSA}\right)^p} - \frac{1}{\left(1 + \frac{\beta}{q} (\bar{V}_{HSA} + \bar{V}_{GFP})\right)^p}$$

## Parameters

|                   |           |
|-------------------|-----------|
| $p$               | $r_{37}$  |
| $\beta V_{HSA}/q$ | $r_{50}$  |
| $\beta V_{GFP}/q$ | $r_{75}$  |
| $r_{6.25}$        | $r_{100}$ |
| $r_{12.5}$        | $r_{200}$ |
| $r_{25}$          |           |

Unknown

**Figure S2 | Outline of our study strategy:** (Blue) The frequency of cells in each quadrant were taken by FACS analyses in 3 independent experiments. (Green) We calculated the predicted frequencies corresponding to the measurements, and the 11 parameters are unknown. (Red) To estimate the distribution of the all parameters, the Bayesian method are applied. Using the estimated distribution, the calculations on the number of infection events were carried out.
